# Supplementary material
Source: PubMed Central journal article supplement (PMC3411191)

# Supplemental figure 1

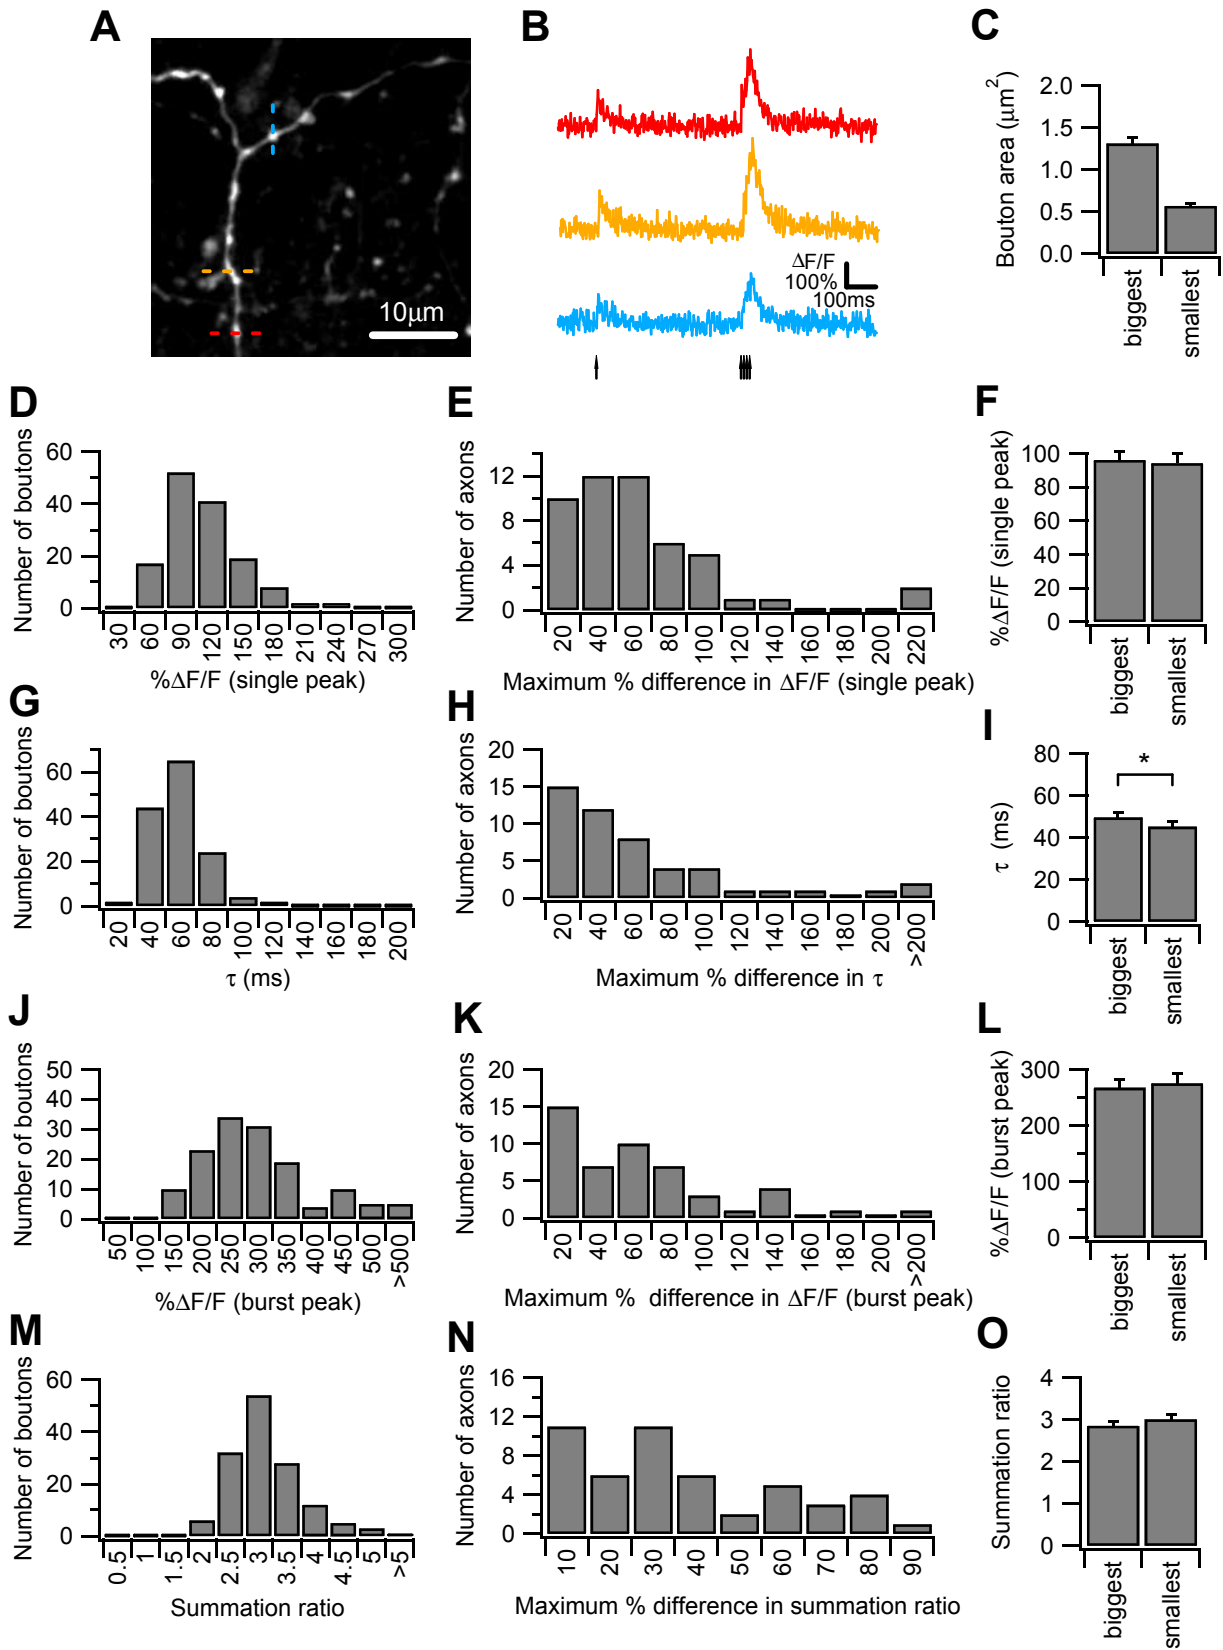

Supplement: NIHMS198462-supplement-1.pdf [file NIHMS198462-supplement-1.pdf]

# Supplemental figure 2

**A**

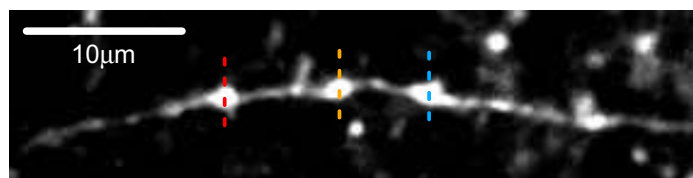

**B**

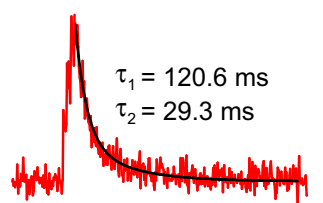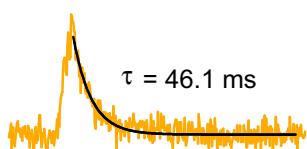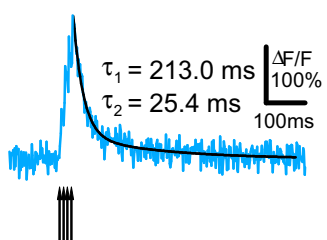

**C**

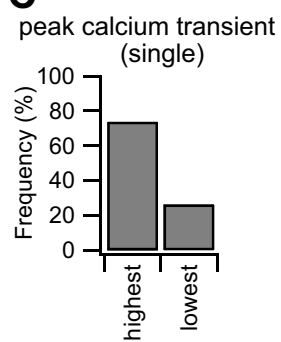

**D**

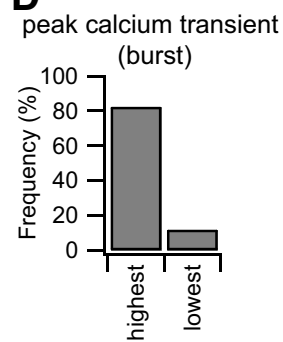

**E**

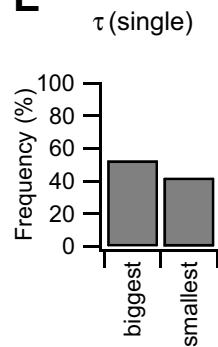

**F**

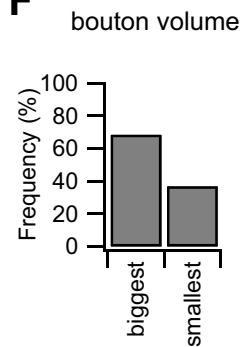

Supplement: NIHMS198462-supplement-2.pdf [file NIHMS198462-supplement-2.pdf]

# Supplemental figure 3

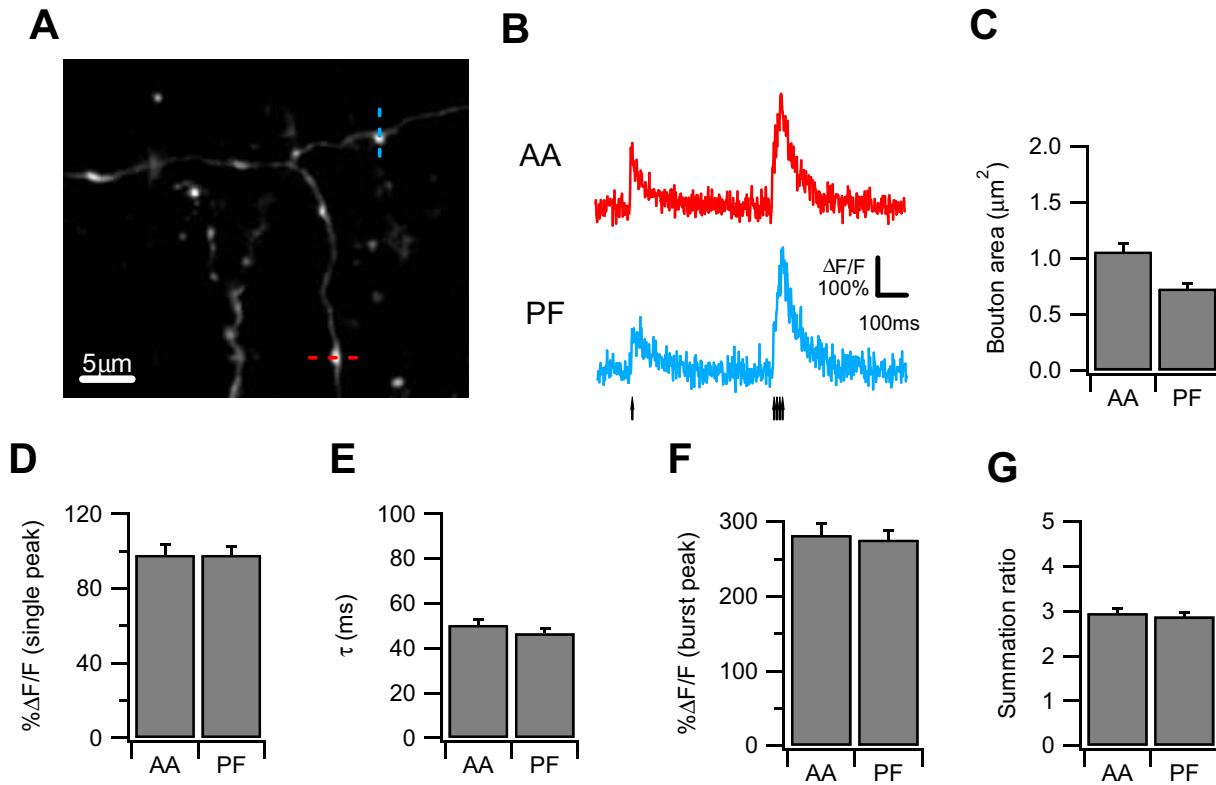

Supplement: NIHMS198462-supplement-3.pdf [file NIHMS198462-supplement-3.pdf]

# Supplemental figure 4

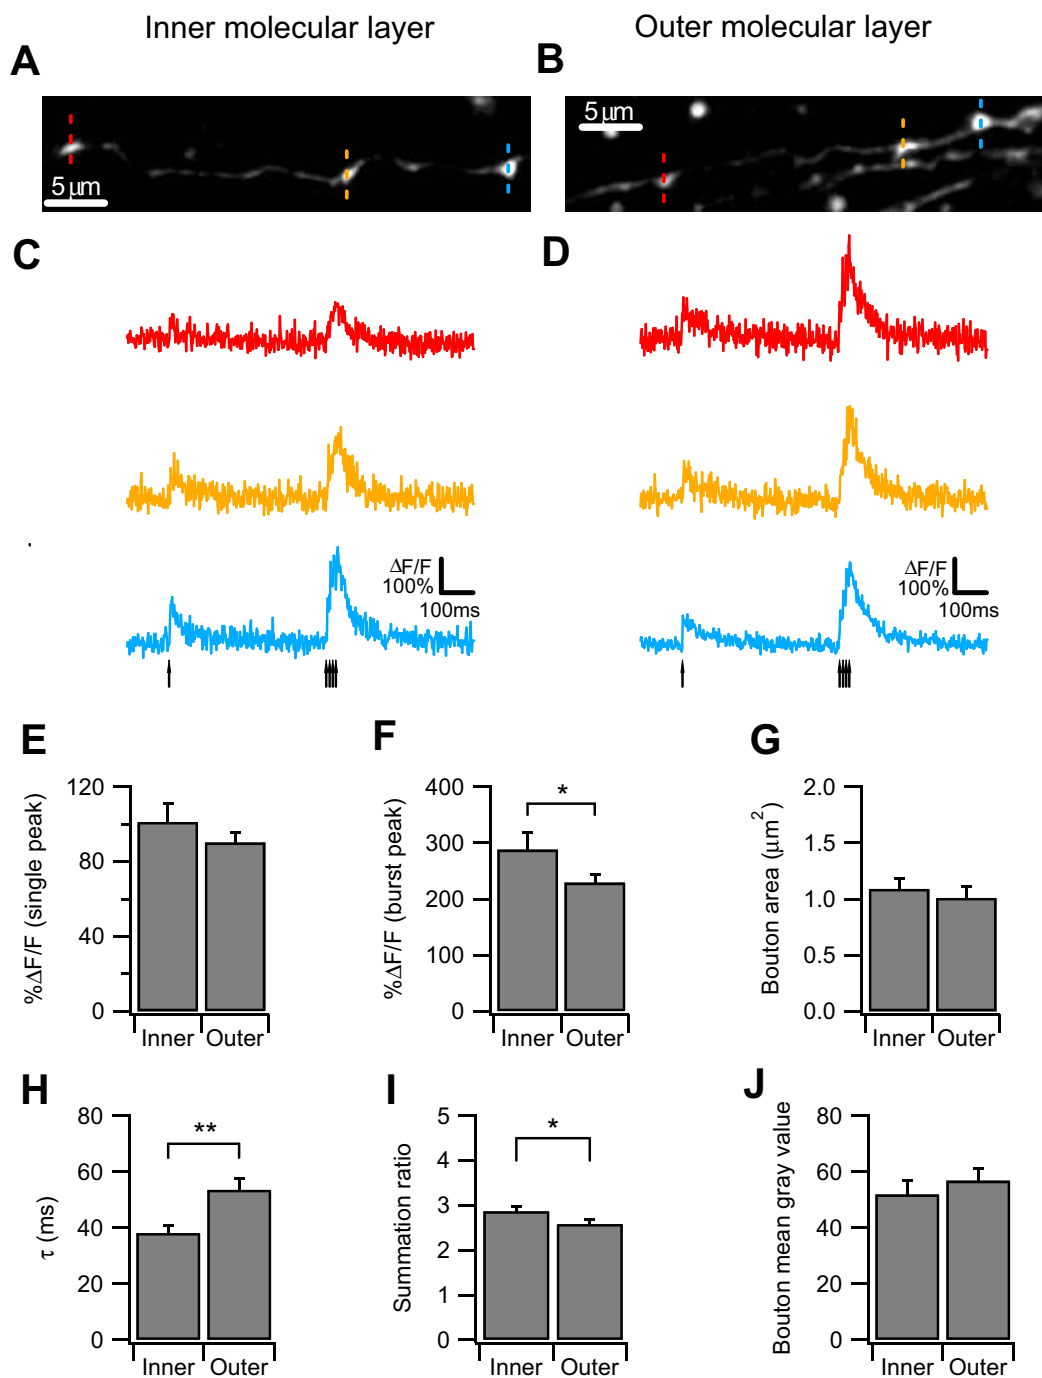

Supplement: NIHMS198462-supplement-4.pdf [file NIHMS198462-supplement-4.pdf]
